# Supplementary material for: Cancer-derived exosomal circ_0038138 enhances glycolysis, growth, and metastasis of gastric adenocarcinoma via the miR-198/EZH2 axis
Source: PubMed Central journal article supplement — Transl Oncol. 2022 Aug 17;25:101479. doi: 10.1016/j.tranon.2022.101479 (PMC9405096; doi:10.1016/j.tranon.2022.101479), 2022-08-17
Supplement: mmc7.pdf [file mmc7.pdf]

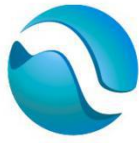

## 细胞遗传质量鉴定检验报告

检品名称：细胞系

检验类型：STR 基因型检验

样品编号：

表 1 样本编号

| 客户样本编号 | 公司编号        |
|--------|-------------|
| 316    | 20220125-01 |

样品数量：1

样品性状：细胞系

检测项目：STR

送检单位：上海中乔新舟生物技术有限公司

检测方法：用 Axygen 的基因组抽提试剂盒提取 DNA，采用 20- STR 扩增方案扩增，在 ABI 3730XL 型遗传分析仪上对 STR 位点和性别基因 Amelogenin 进行检测。

检验结果：

### (一) 检验基本情况

表 2：样本基因型检验结果

|             | 多等位基因 | 匹配细胞系 | 细胞库  | EV 值 | 匹配说明 |
|-------------|-------|-------|------|------|------|
| 20220125-01 | 无     | 769-P | ATCC | 0.87 | 基本匹配 |

- 多等位基因指三等位及以上基因现象。
- 本次检测各细胞分型结果良好。

### (二) 各样本描述



## Certificate of STR Analysis

- 20181123-01: 该株细胞 DNA 分型在细胞系检索中找到**基本匹配**的细胞系, DSMZ 数据库显示细胞名为 **769-P**, 细胞号对应 **CRL-1933**。本次检测在该细胞系中**没有发现多等位基因**。

**备注:** 待测细胞系与收录于 ATCC, DSMZ, JCRB 和 RIKEN 数据库的细胞系 STR 数据进行比对, 未收录于以上细胞库的细胞系将无法匹配。

### (三) 样本分型结果

| 细胞的 STR 位点和 Amelogenin 位点的基因分型结果 |             |         |         |                            |         |         |
|----------------------------------|-------------|---------|---------|----------------------------|---------|---------|
| Loci                             | 送检细胞 STR 信息 |         |         | 细胞库细胞 STR 信息               |         |         |
|                                  | 送检细胞名: 476  |         |         | 细胞库细胞名: SGC-7901 [SGC7901] |         |         |
|                                  | Allele1     | Allele2 | Allele3 | Allele1                    | Allele2 | Allele3 |
| D5S818                           | 12          |         |         | 12                         |         |         |
| D13S317                          | 10          | 14      |         | 10                         | 14      |         |
| D7S820                           | 10          | 11      |         | 10                         | 11      |         |
| D16S539                          | 9           | 13      |         | 9                          | 13      |         |
| VWA                              | 18          |         |         | 18                         |         |         |
| TH01                             | 6           | 9.3     |         | 6                          | 9.3     |         |
| AMEL                             | X           |         |         | X                          |         |         |
| TPOX                             | 8           | 11      |         | 8                          | 11      |         |
| CSF1P0                           | 11          | 12      |         | 11                         | 12      |         |
| D12S391                          | 21          | 25      |         |                            |         |         |
| FGA                              | 21          | 22      |         |                            |         |         |
| D2S1338                          | 17          | 18      |         |                            |         |         |
| D21S11                           | 27          | 28      |         |                            |         |         |
| D18S51                           | 16          | 19      |         |                            |         |         |
| D8S1179                          | 12          | 13      |         |                            |         |         |
| D3S1358                          | 15          | 16      |         |                            |         |         |

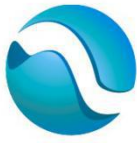

### Certificate of STR Analysis

|         |    |    |  |  |  |  |
|---------|----|----|--|--|--|--|
| D6S1043 | 18 | 19 |  |  |  |  |
| PENTAE  | 7  | 15 |  |  |  |  |
| D19S433 | 13 | 13 |  |  |  |  |
| PENTAD  | 8  | 15 |  |  |  |  |
| D1S1656 | 12 | 17 |  |  |  |  |

其他说明：

(一)分型方案及位点分布：

附表：实验方案及位点

|   | 方案 1        | 方案 2    | 方案 3        | 方案 4    |
|---|-------------|---------|-------------|---------|
| 1 | TH01        | TPOX    | D3S135<br>8 | AMEL    |
| 2 | D12S39<br>1 | VWA     | D13S31<br>7 | D5S818  |
| 3 | D7S820      | D8S1179 | D6S104<br>3 | D2S1338 |
| 4 | CSF1PO      | PENTAD  | D16S53<br>9 | D21S11  |
| 5 | FGA         |         | D19S43<br>3 | D18S51  |
| 6 | PENTAE      |         |             |         |



# Certificate of STR Analysis

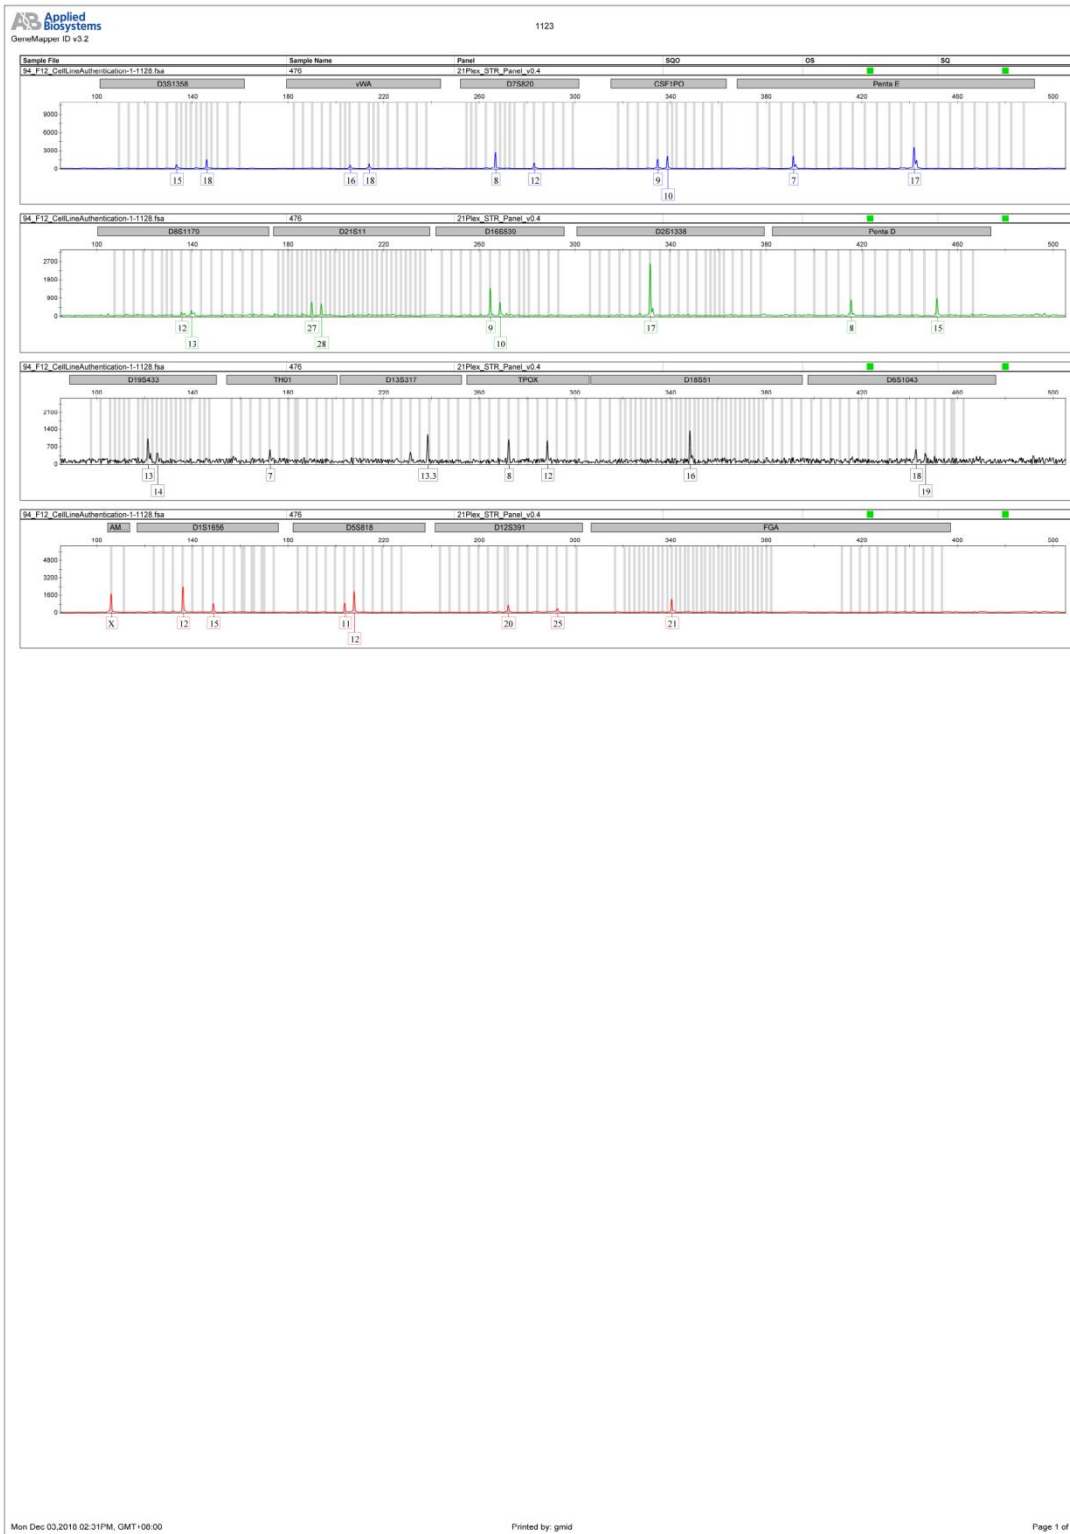

签发日期：  
2018年12月

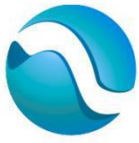

中乔新舟  
CELL RESEARCH

## Certificate of STR Analysis

---
